# Supplementary material for: High expression of miR-181c as a predictive marker of recurrence in stage II colorectal cancer
Source: PubMed Central journal article supplement (PMC5351683; doi:10.18632/oncotarget.14344), 2016-12-28
Supplement: oncotarget-08-6970-s001.pdf [file oncotarget-08-6970-s001.pdf]

# High expression of miR-181c as a predictive marker of recurrence in stage II colorectal cancer

## SUPPLEMENTARY FIGURES AND TABLE

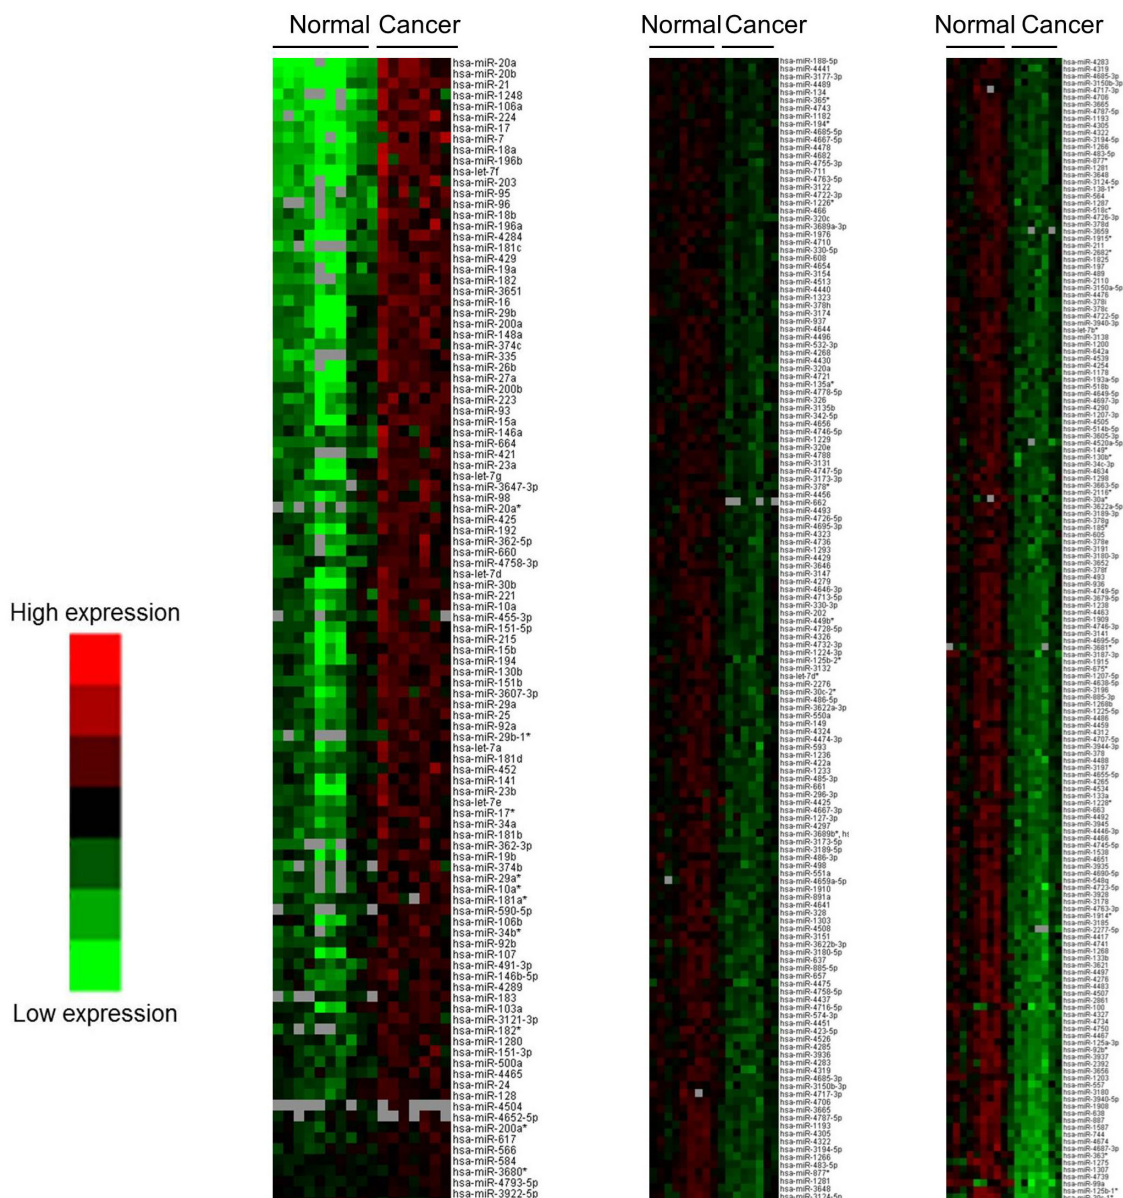

**Supplementary Figure 1: Differences in the miRNA expression in the frozen tissues between cancerous and noncancerous tissues using a heat map for the preliminary study.** Totally, 394 miRNAs showed different miRNA expressions between cancerous and noncancerous tissues ( $P < 0.01$ ). In the 394 miRNAs, 105 miRNAs showed higher expressions in the cancer tissues than in the normal tissues.

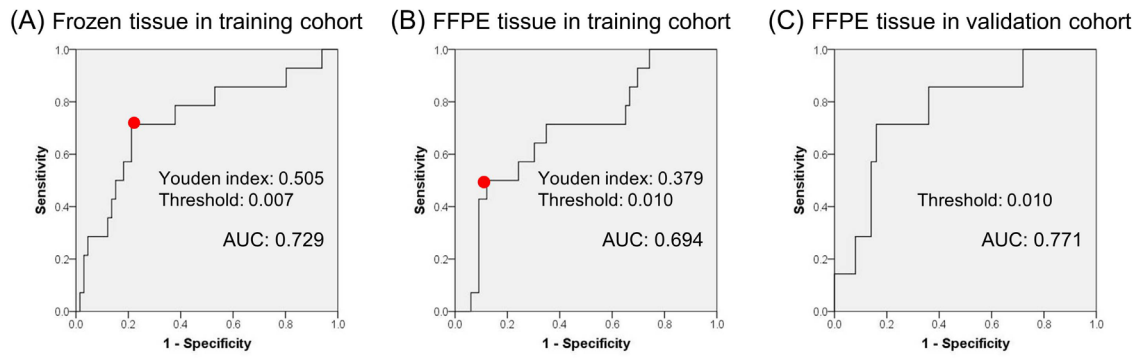

**Supplementary Figure 2: ROC curve of miR-181c for recurrence. A.** Frozen tissues in the training cohort. **B.** FFPE tissues in the training cohort. **C.** FFPE tissues in the validation cohort.

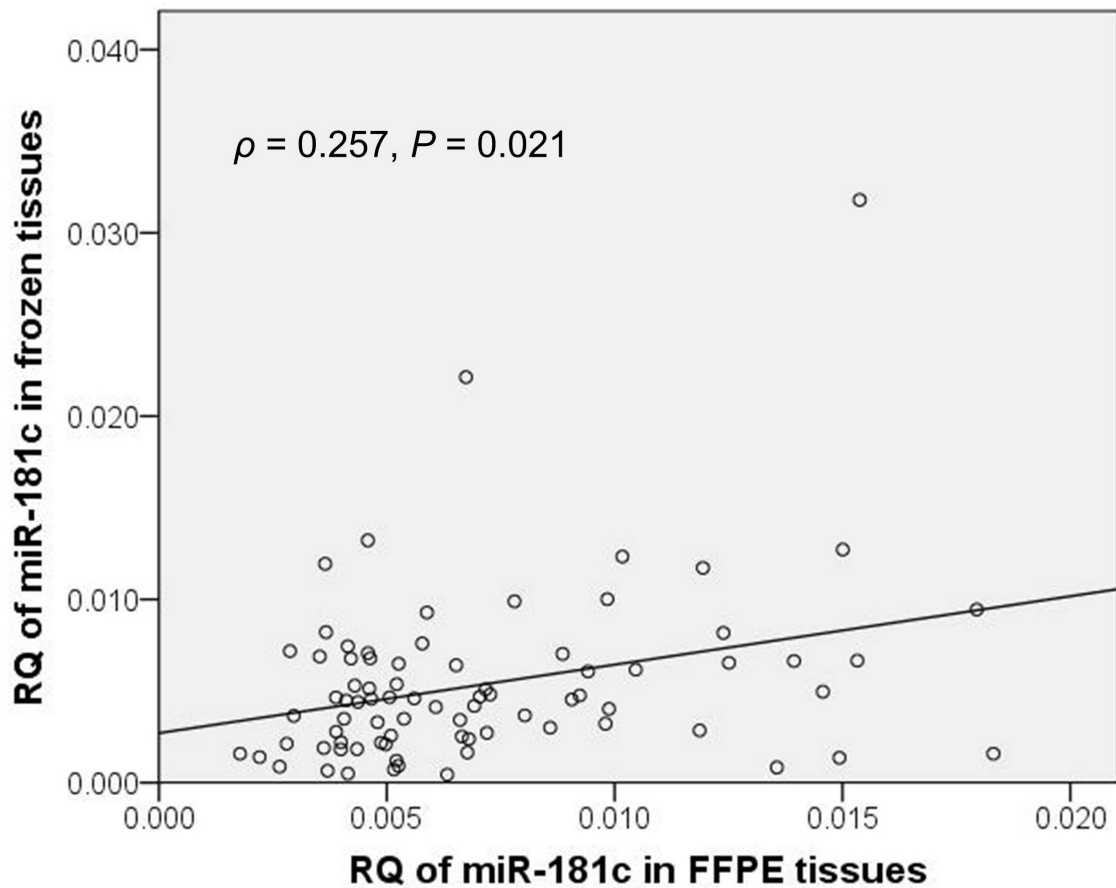

**Supplementary Figure 3: Scatter plots showing the correlation between relative quantification of miR-181c in frozen and matched FFPE tissues obtained from 80 CRC patients in the training cohort. A positive correlation was found by Spearman correlation ( $\rho = 0.257, P = 0.021$ ).**

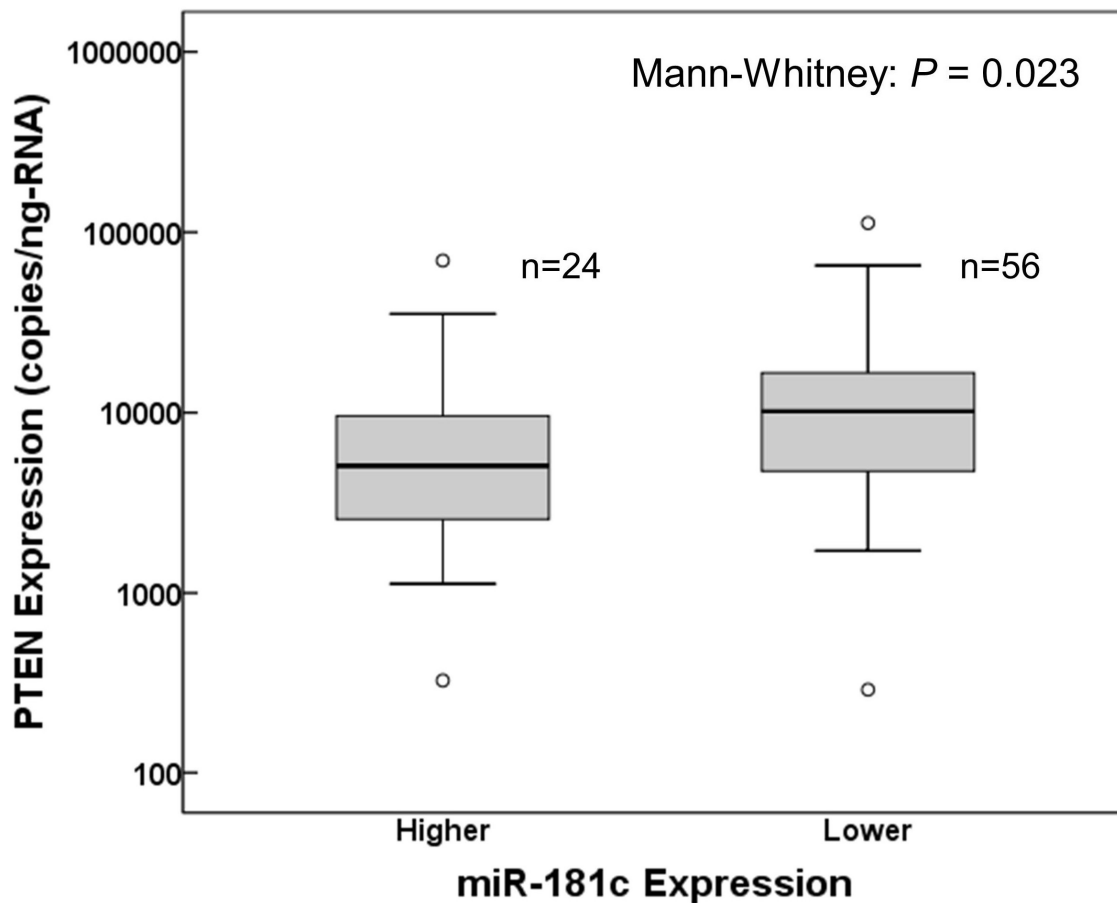

**Supplementary Figure 4: The correlation between the expression of miR-181c and PTEN in training cohort using frozen tissues.** The expression of PTEN was significantly lower in the patients with higher miR-181c expression than those with lower expression ( $P = 0.023$ ).

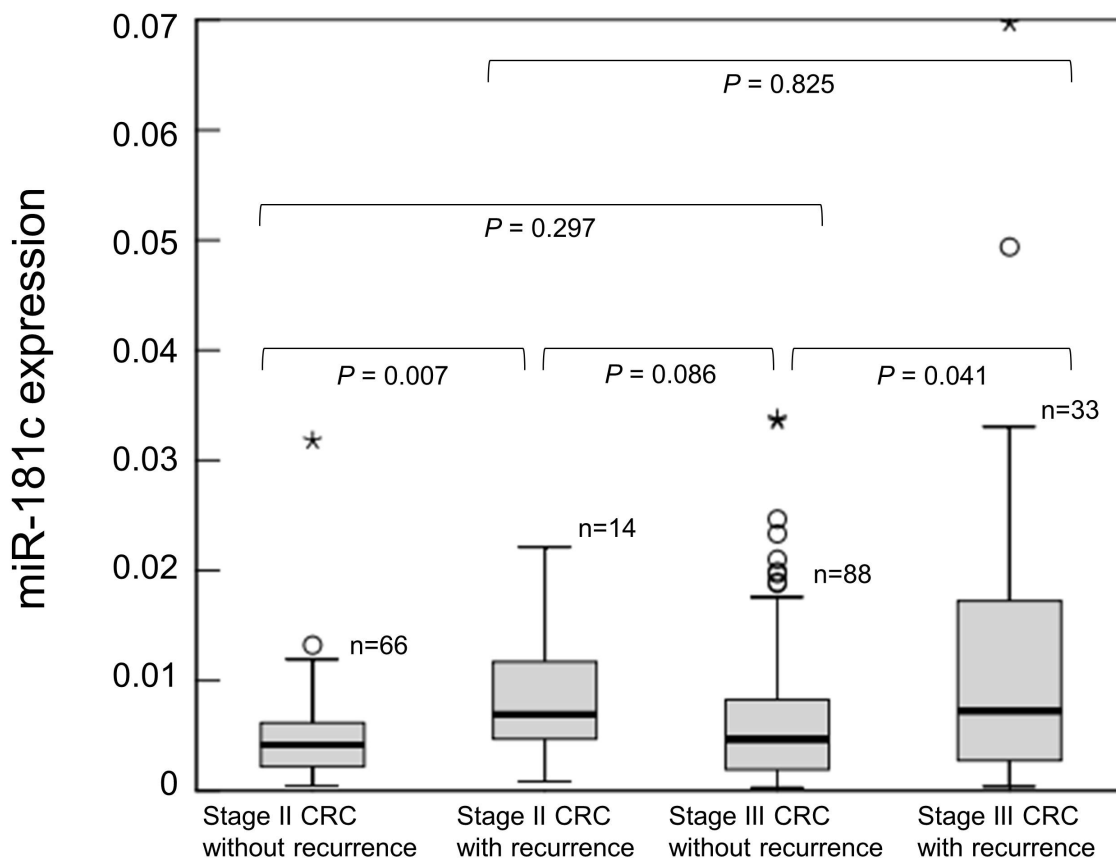

**Supplementary Figure 5: The expression of miR-181c compared with stage II CRC patients and stage III CRC patients in the preliminary study using frozen tissues.** The expression of miR-181c in stage II CRC patients without recurrence was not showed significantly difference from that in the stage III CRC patients without recurrence ( $P = 0.297$ ). Moreover, that in stage II CRC patients with recurrence was similar compared with that in stage III patients with recurrence ( $P = 0.825$ ). In addition, that in stage III CRC patients with recurrence was significantly higher with that in stage III patients without recurrence ( $P = 0.048$ ).

Supplementary Table 1: Ct value of miRNA in the frozen tissue and FFPE tissue of training and validation cohort

|               | Training cohort                    |           |                                       |           | Validation cohort                 |           |                                       |           |
|---------------|------------------------------------|-----------|---------------------------------------|-----------|-----------------------------------|-----------|---------------------------------------|-----------|
|               | CRC patients with recurrence, n=14 |           | CRC patients without recurrence, n=66 |           | CRC patients with recurrence, n=7 |           | CRC patients without recurrence, n=50 |           |
|               | median                             | range     | median                                | range     | median                            | range     | median                                | range     |
| Frozen Tissue |                                    |           |                                       |           |                                   |           |                                       |           |
| let-7a        | 23.7                               | 21.6—26.2 | 24.8                                  | 21.9—28.8 |                                   |           |                                       |           |
| let-7d        | 26.4                               | 25.0—28.1 | 27.1                                  | 24.4—31.7 |                                   |           |                                       |           |
| let-7e        | 23.1                               | 21.0—24.7 | 23.8                                  | 20.6—26.4 |                                   |           |                                       |           |
| miR-18b       | 36.8                               | 31.4—39.8 | 37.4                                  | 33.1—39.9 |                                   |           |                                       |           |
| miR-23c       | 30.0                               | 28.2—34.3 | 31.2                                  | 27.7—36.1 |                                   |           |                                       |           |
| miR-26b       | 23.3                               | 21.8—24.0 | 23.5                                  | 21.8—25.9 |                                   |           |                                       |           |
| miR-128a      | 26.8                               | 26.4—29.0 | 27.6                                  | 26.1—30.0 |                                   |           |                                       |           |
| miR-146b      | 23.2                               | 22.4—25.0 | 23.8                                  | 21.3—25.1 |                                   |           |                                       |           |
| miR-148b      | 26.2                               | 27.3—29.3 | 28.2                                  | 26.9—30.7 |                                   |           |                                       |           |
| miR-151-5p    | 26.6                               | 24.8—28.1 | 27.3                                  | 25.0—28.1 |                                   |           |                                       |           |
| miR-181c      | 28.6                               | 27.4—30.2 | 29.5                                  | 27.2—32.2 |                                   |           |                                       |           |
| miR-221       | 23.7                               | 22.7—25.7 | 24.1                                  | 22.3—25.8 |                                   |           |                                       |           |
| miR-222       | 22.6                               | 22.0—24.0 | 22.7                                  | 21.0—23.8 |                                   |           |                                       |           |
| miR-361       | 27.2                               | 26.5—29.4 | 28.4                                  | 26.5—31.0 |                                   |           |                                       |           |
| miR-500       | 29.1                               | 27.7—31.1 | 29.5                                  | 28.0—31.5 |                                   |           |                                       |           |
| miR-24        | 20.7                               | 19.8—21.7 | 21.1                                  | 19.4—22.8 |                                   |           |                                       |           |
| RNU6B         | 27.7                               | 25.2—30.7 | 28.0                                  | 24.7—33.0 |                                   |           |                                       |           |
| U6snRNA       | 21.3                               | 18.2—23.3 | 21.4                                  | 18.1—23.0 |                                   |           |                                       |           |
| FFPE tissue   |                                    |           |                                       |           |                                   |           |                                       |           |
| let-7a        | 23.2                               | 21.3—23.8 | 23.0                                  | 21.4—25.3 |                                   |           |                                       |           |
| let-7d        | 24.2                               | 23.2—24.8 | 24.2                                  | 23.5—26.1 |                                   |           |                                       |           |
| let-7e        | 22.5                               | 21.4—23.4 | 22.6                                  | 21.5—24.4 |                                   |           |                                       |           |
| miR-23c       | 27.1                               | 25.7—28.8 | 27.0                                  | 26.0—28.5 |                                   |           |                                       |           |
| miR-26b       | 23.1                               | 21.8—23.9 | 23.3                                  | 22.1—25.3 |                                   |           |                                       |           |
| miR-128a      | 27.4                               | 26.7—28.3 | 27.7                                  | 26.4—28.9 |                                   |           |                                       |           |
| miR-148b      | 27.1                               | 26.0—27.7 | 27.4                                  | 26.1—28.4 |                                   |           |                                       |           |
| miR-151-5p    | 26.3                               | 25.2—27.6 | 26.5                                  | 25.0—35.3 |                                   |           |                                       |           |
| miR-181c      | 27.8                               | 26.3—28.9 | 28.0                                  | 26.5—30.0 | 28.2                              | 27.1—29.5 | 29.3                                  | 27.5—32.0 |
| miR-361       | 27.8                               | 26.4—28.8 | 27.8                                  | 26.2—29.7 |                                   |           |                                       |           |
| U6snRNA       | 20.6                               | 20.1—21.8 | 20.7                                  | 19.4—22.5 | 21.8                              | 20.5—22.6 | 21.4                                  | 19.8—23.9 |

CRC: colorectal cancer,
